# Supplementary material
Source: publisher figshare collection journal article supplement (https://tandf.figshare.com/articles/dataset/_/6714086)
Supplement: Supplementary file 1 [file 1]

**Annex III: Politicisation in the five Member States separately**

NB:

Different scales on vertical axis to allow for scrutiny of the separate cases.

2016 values cover the period 1 January to 30 June

**Panel 1: Politicisation across member states**

**Panel 2: Use of term 'welfare tourism' or equivalents**

**Panel 3: Opinion expressed concerning cross-border welfare in the EU**
